# Supplementary material
Source: PubMed Central journal article supplement (PMC8454218)
Supplement: NIHMS1736896-supplement-Table_S1.pdf [file NIHMS1736896-supplement-Table_S1.pdf]

**Table S1: gene library used in study**

| <b>Locus_tag</b> | <b>Gene name</b> | <b>Gene description</b>                        |
|------------------|------------------|------------------------------------------------|
| P1_gp003         | cre              | Phage P1 negative control gene                 |
| P1_gp013         | pro              | Phage P1 negative control gene                 |
| P1_gp078         | dbn              | Phage P1 negative control gene                 |
| PA14_00010       | dnaA             | chromosomal replication initiator protein DnaA |
| PA14_00560       | exoT             | exoenzyme T                                    |
| PA14_00640       | phzH             | phenazine-modifying enzyme                     |
| PA14_01160       | vgrG             | T6SS protein                                   |
| PA14_01300       | coxA             | cytochrome c oxidase, subunit I                |
| PA14_01720       | ahpF             | alkyl hydroperoxide reductase subunit F        |
| PA14_01970       | TriC             | Triclosan RND efflux transporter               |
| PA14_03650       | cysA             | sulfate transport protein CysA                 |
| PA14_03920       | spuD             | polyamine transport protein                    |
| PA14_04410       | ptsP             | phosphoenolpyruvate-protein phosphotransferase |
| PA14_04930       | rpoH             | RNA polymerase sigma-32 factor                 |
| PA14_05310       | gshB             | glutathione synthetase                         |
| PA14_05540       | mexB             | RND multidrug efflux transporter MexB          |
| PA14_06750       | nirS             | nitrite reductase precursor                    |
| PA14_06830       | norB             | nitric-oxide reductase subunit B               |
| PA14_06870       | dnr              | transcriptional regulator Dnr                  |
| PA14_07520       | rpoD             | sigma factor RpoD                              |
| PA14_08150       | PA14_08150       | Pyocin R2 F2 operon                            |
| PA14_08370       | vfr              | cyclic AMP receptor-like protein               |
| PA14_08910       | rpsC             | 30S ribosomal protein S3                       |
| PA14_09115       | rpoA             | DNA-directed RNA polymerase alpha chain        |
| PA14_09150       | katA             | catalase                                       |
| PA14_09280       | pchF             | pyochelin synthetase PchF                      |
| PA14_09400       | phzS             | flavin-containing monooxygenase                |
| PA14_09440       | phzE1            | phenazine biosynthesis protein PhzE            |
| PA14_09490       | phzM             | phenazine-specific methyltransferase           |
| PA14_09520       | mexI             | probable RND efflux transporter                |
| PA14_10500       | ccoN4            | cytochrome c oxidase subunit (cbb3-type)       |
| PA14_10790       | ampC             | cephalosporinase                               |

|            |       |                                                            |
|------------|-------|------------------------------------------------------------|
| PA14_13780 | narG  | respiratory nitrate reductase alpha subun                  |
| PA14_14680 | suhB  | extragenic suppressor protein SuhB                         |
| PA14_16250 | lasB  | elastase LasB                                              |
| PA14_16500 | wspR  | two-component response regulator                           |
| PA14_17290 | pyrG  | CTP synthase                                               |
| PA14_17480 | rpoS  | sigma factor RpoS                                          |
| PA14_17530 | recA  | RecA protein                                               |
| PA14_18580 | algD  | GDP-mannose 6-dehydrogenase AlgD                           |
| PA14_19100 | rhIA  | rhamnosyltransferase chain A                               |
| PA14_19120 | rhIR  | acylhomoserine lactone dependent transcriptional regulator |
| PA14_19130 | rhII  | autoinducer synthesis protein RhII                         |
| PA14_20200 | nosZ  | nitrous-oxide reductase precursor                          |
| PA14_22980 | glbB  | binding protein component of ABC sugar transporter         |
| PA14_23920 | purF  | amidophosphoribosyltransferase                             |
| PA14_24480 | pelA  | conserved hypothetical protein                             |
| PA14_25080 | fadB  | fatty-acid oxidation complex alpha-subunit                 |
| PA14_25560 | rne   | ribonuclease E                                             |
| PA14_27480 | htpX  | heat shock protein HtpX                                    |
| PA14_30050 | aceA  | isocitrate lyase                                           |
| PA14_30630 | pqsH  | FAD-dependent monooxygenase                                |
| PA14_32390 | mexF  | RND multidrug efflux transporter MexF                      |
| PA14_33700 | pvdF  | pyoverdine synthetase F                                    |
| PA14_34050 | impC  | conserved hypothetical protein                             |
| PA14_35670 | pslG  | glycosyl hydrolase                                         |
| PA14_36310 | hcnC  | hydrogen cyanide synthase HcnC                             |
| PA14_36345 | exoY  | adenylate cyclase ExoY                                     |
| PA14_38410 | amrB  | RND multidrug efflux transporter                           |
| PA14_39330 | rbsA  | ribose ABC transporter, ATP-binding protein                |
| PA14_40290 | lasA  | staphylolytic protease preproenzyme LasA                   |
| PA14_40510 | ccoN3 | cytochrome c oxidase, cbb3-type, subunit                   |
| PA14_41220 | lon   | Lon protease                                               |
| PA14_41230 | clpX  | ATP-dependent Clp protease ATP-binding subunit ClpX        |
| PA14_41440 | uspL  | universal stress protein                                   |
| PA14_41510 | nasA  | nitrate transporter                                        |

|            |            |                                                          |
|------------|------------|----------------------------------------------------------|
| PA14_41575 | sigX       | ECF sigma factor SigX                                    |
| PA14_42350 | pscC       | Type III secretion outer membrane protein PscC precursor |
| PA14_42500 | pcrD       | type III secretory apparatus protein PcrD                |
| PA14_43950 | sucC       | succinyl-CoA synthetase beta subunit                     |
| PA14_44340 | ccoN2      | cytochrome oxidase subunit (cbb3-type)                   |
| PA14_44370 | ccoN1      | cytochrome oxidase subunit (cbb3-type)                   |
| PA14_44490 | anr        | transcriptional regulator Anr                            |
| PA14_45630 | fliA       | motility sigma factor FliA                               |
| PA14_45940 | lasI       | autoinducer synthesis protein LasI                       |
| PA14_45960 | lasR       | transcriptional regulator LasR                           |
| PA14_48060 | aprA       | alkaline metalloproteinase precursor                     |
| PA14_48930 | PA14_48930 | pf5 phage gene                                           |
| PA14_49250 | napA       | periplasmic nitrate reductase protein NapA               |
| PA14_50290 | fliC       | flagellin type B                                         |
| PA14_50360 | flgK       | flagellar hook-associated protein 1 FlgK                 |
| PA14_51340 | mvfR       | Transcriptional regulator MvfR                           |
| PA14_51410 | pqsC       | PqsC                                                     |
| PA14_52180 | relA       | GTP pyrophosphokinase                                    |
| PA14_52270 | ldhA       | D-lactate dehydrogenase (fermentative)                   |
| PA14_52580 | lysC       | aspartate kinase alpha and beta chain                    |
| PA14_53470 | ackA       | probable acetate kinase                                  |
| PA14_54430 | algU       | sigma factor AlgU                                        |
| PA14_56220 | uspM       | universal stress protein                                 |
| PA14_56780 | sodB       | iron superoxide dismutase                                |
| PA14_57940 | rpoN       | RNA polymerase sigma-54 factor                           |
| PA14_58000 | sodM       | superoxide dismutase                                     |
| PA14_58730 | pilA       | type IV pilin structural subunit                         |
| PA14_60310 | pilY1      | type 4 fimbrial biogenesis protein PilY1                 |
| PA14_61040 | katB       | catalase                                                 |
| PA14_61060 | fnr-2      | ferredoxin--NADP+ reductase                              |
| PA14_61200 | cdrA       | conserved hypothetical protein                           |
| PA14_62160 | ilvI       | acetolactate synthase large subunit                      |
| PA14_62710 | pnp        | polyribonucleotide nucleotidyltransferase                |
| PA14_62730 | truB       | tRNA pseudouridine 55 synthase                           |

|            |      |                                                                  |
|------------|------|------------------------------------------------------------------|
| PA14_62860 | ftsH | cell division protein FtsH                                       |
| PA14_68330 | arcA | Arginine fermentation                                            |
| PA14_69190 | rho  | transcription termination factor Rho                             |
| PA14_70470 | spoT | guanosine-3',5'-bis(diphosphate) 3'-pyrophosphohydrolase         |
| PA14_70560 | OxyR | transcriptional regulator, LysR family                           |
| PA14_70860 | pstS | phosphate ABC transporter, periplasmic phosphate-binding protein |
| PA14_72960 | kgtP | MFS dicarboxylate transporter                                    |
| PA14_73260 | atpA | ATP synthase alpha chain                                         |
