# Supplementary material
Source: PubMed Central journal article supplement (PMC8454218)
Supplement: NIHMS1736896-supplement-Table_S3.pdf [file NIHMS1736896-supplement-Table_S3.pdf]

**Table S3: 16S rRNA probes**

| Probe_id                | 16S pos | 16S seq                       | Full probe sequence                                                            |
|-------------------------|---------|-------------------------------|--------------------------------------------------------------------------------|
| Ribo-Tag_1              | 771-799 | GCGTGGACTACCAGGGTATCTAATCCTG  | CGATTAGTCGTCACAAAGCGTGGACTACCAGGGTATCTAATCCTGAAACTCCGAATGCTACG                 |
| Ribo-Tag_2              | 771-799 | GCGTGGACTACCAGGGTATCTAATCCTG  | CGATTAGTCGTCACAAAGCGTGGACTACCAGGGTATCTAATCCTGAAAGTTACACGGGACTA                 |
| Ribo-Tag_3              | 771-799 | GCGTGGACTACCAGGGTATCTAATCCTG  | ACTCCGAATGCTACGAAGCGTGGACTACCAGGGTATCTAATCCTGAAAGTTACACGGGACTA                 |
| Ribo-Tag_4              | 771-799 | GCGTGGACTACCAGGGTATCTAATCCTG  | ATGTAACCAAGCGTCAAGCGTGGACTACCAGGGTATCTAATCCTGAATCAGTTACCGGTGTA                 |
| Ribo-Tag_5              | 771-799 | GCGTGGACTACCAGGGTATCTAATCCTG  | ATGTAACCAAGCGTCAAGCGTGGACTACCAGGGTATCTAATCCTGAATCCAGCTTACGTTCCG                |
| Ribo-Tag_6              | 771-799 | GCGTGGACTACCAGGGTATCTAATCCTG  | TCAGTTACCGGTGTAAGCGTGGACTACCAGGGTATCTAATCCTGAATCCAGCTTACGTTCCG                 |
| Ribo-Tag_7              | 771-799 | GCGTGGACTACCAGGGTATCTAATCCTG  | CGATTAGTCGTCACAAAGCGTGGACTACCAGGGTATCTAATCCTGAATCAGTTACCGGTGTA                 |
| Ribo-Tag_8              | 771-799 | GCGTGGACTACCAGGGTATCTAATCCTG  | CGATTAGTCGTCACAAAGCGTGGACTACCAGGGTATCTAATCCTGAATCCAGCTTACGTTCCG                |
| Ribo-Tag_9              | 771-799 | GCGTGGACTACCAGGGTATCTAATCCTG  | ATGTAACCAAGCGTCAAGCGTGGACTACCAGGGTATCTAATCCTGAAACTCCGAATGCTACG                 |
| Ribo-Tag_10             | 771-799 | GCGTGGACTACCAGGGTATCTAATCCTG  | ATGTAACCAAGCGTCAAGCGTGGACTACCAGGGTATCTAATCCTGAAAGTTACACGGGACTA                 |
| Ribo-Tag_11             | 771-799 | GCGTGGACTACCAGGGTATCTAATCCTG  | ACTCCGAATGCTACGAAGCGTGGACTACCAGGGTATCTAATCCTGAATCCAGCTTACGTTCCG                |
| Ribo-Tag_12             | 771-799 | GCGTGGACTACCAGGGTATCTAATCCTG  | TCAGTTACCGGTGTAAGCGTGGACTACCAGGGTATCTAATCCTGAAAGTTACACGGGACTA                  |
| Reference (all samples) | 714-743 | CAGTGTCAAGTATCAGTCCAGTGGTGCCT | TATGTGACTACGCACAACGTGATCCAGTATAACAGTGTCAAGTATCAGTCCAGTGGTGCCTAACTATTATCGCCGAGA |
