# Supplementary material
Source: PubMed Central journal article supplement (PMC8454218)
Supplement: NIHMS1736896-supplement-Table_S4.pdf [file NIHMS1736896-supplement-Table_S4.pdf]

**Table S4 - UMAP cluster frequency (%) per LB growth condition**

| Cluster | OD = 0.03<br>(lag_0.5h) | OD = 0.03<br>(lag_1h) | OD = 0.06 | OD_0.2 | OD_0.45 | OD_0.85 | OD_1.2 | OD_1.5 | OD_1.8 | OD_2.1 | OD_3.2 |
|---------|-------------------------|-----------------------|-----------|--------|---------|---------|--------|--------|--------|--------|--------|
| 1       | 6.71%                   | 29.94%                | 45.89%    | 56.18% | 74.52%  | 2.31%   | 0.05%  | 0.00%  | 0.02%  | 0.00%  | 0.00%  |
| 2       | 0.04%                   | 0.02%                 | 0.00%     | 0.09%  | 0.03%   | 0.27%   | 88.59% | 17.43% | 0.82%  | 0.87%  | 0.75%  |
| 3       | 53.44%                  | 47.55%                | 12.96%    | 3.52%  | 6.33%   | 1.93%   | 0.02%  | 0.02%  | 0.21%  | 0.19%  | 0.04%  |
| 4       | 0.00%                   | 0.00%                 | 0.00%     | 0.00%  | 0.07%   | 0.15%   | 2.38%  | 31.72% | 19.97% | 15.96% | 7.10%  |
| 5       | 0.22%                   | 0.13%                 | 0.03%     | 0.00%  | 0.00%   | 0.08%   | 0.86%  | 8.23%  | 17.19% | 20.77% | 21.23% |
| 6       | 0.04%                   | 0.02%                 | 0.09%     | 0.05%  | 2.80%   | 92.22%  | 0.66%  | 0.44%  | 0.15%  | 0.05%  | 0.04%  |
| 7       | 0.13%                   | 0.04%                 | 0.00%     | 0.00%  | 0.17%   | 0.50%   | 1.45%  | 9.83%  | 12.33% | 13.91% | 9.46%  |
| 8       | 0.61%                   | 8.05%                 | 30.30%    | 28.34% | 9.33%   | 0.31%   | 0.00%  | 0.02%  | 0.02%  | 0.03%  | 0.00%  |
| 9       | 0.17%                   | 0.11%                 | 0.03%     | 0.00%  | 0.00%   | 0.12%   | 0.52%  | 4.76%  | 9.74%  | 9.32%  | 9.94%  |
| 10      | 0.04%                   | 0.16%                 | 0.03%     | 0.05%  | 0.17%   | 0.27%   | 0.70%  | 4.78%  | 8.37%  | 10.13% | 7.47%  |
| 11      | 0.35%                   | 0.40%                 | 0.18%     | 0.27%  | 0.31%   | 0.69%   | 1.31%  | 4.49%  | 7.71%  | 8.61%  | 7.08%  |
| 12      | 0.09%                   | 0.09%                 | 0.00%     | 0.14%  | 0.35%   | 0.08%   | 0.38%  | 0.46%  | 1.35%  | 1.50%  | 23.30% |
| 13      | 34.56%                  | 5.03%                 | 1.80%     | 1.85%  | 1.73%   | 0.12%   | 0.18%  | 0.53%  | 0.71%  | 0.65%  | 0.42%  |
| 14      | 0.04%                   | 0.04%                 | 0.03%     | 0.00%  | 0.03%   | 0.23%   | 0.88%  | 5.10%  | 6.82%  | 6.53%  | 3.78%  |
| 15      | 0.13%                   | 0.04%                 | 0.00%     | 0.00%  | 0.03%   | 0.27%   | 1.04%  | 5.80%  | 6.55%  | 4.67%  | 3.82%  |
| 16      | 2.90%                   | 8.09%                 | 8.19%     | 8.94%  | 2.73%   | 0.12%   | 0.00%  | 0.00%  | 0.00%  | 0.02%  | 0.00%  |
| 17      | 0.17%                   | 0.04%                 | 0.12%     | 0.00%  | 0.07%   | 0.04%   | 0.23%  | 2.04%  | 3.16%  | 2.73%  | 3.76%  |
| 18      | 0.04%                   | 0.02%                 | 0.03%     | 0.00%  | 0.07%   | 0.08%   | 0.29%  | 2.77%  | 2.74%  | 2.15%  | 0.39%  |
| 19      | 0.09%                   | 0.02%                 | 0.00%     | 0.00%  | 0.00%   | 0.12%   | 0.29%  | 0.73%  | 1.42%  | 1.47%  | 0.62%  |
| 20      | 0.22%                   | 0.18%                 | 0.31%     | 0.59%  | 1.24%   | 0.12%   | 0.16%  | 0.85%  | 0.74%  | 0.44%  | 0.81%  |
